# Supplementary material for: Microstructured Polymeric Fabrics Modulating the Paracrine Activity of Adipose-Derived Stem Cells
Source: MDPI journal article supplement (doi:10.3390/ijms241210123), 2023-06-14
Supplement: s1 [file s1]

# Microstructured Polymeric Fabrics Modulating the Paracrine Activity of Adipose-Derived Stem Cells

Federica Grilli <sup>1,2</sup>, Ennio Albanesi <sup>3</sup>, Beatriz Pelacho <sup>4,5</sup>, Felipe Prosper <sup>4,5</sup>,  
Paolo Decuzzi <sup>1,†</sup> and Daniele Di Mascolo <sup>1,6,\*,†</sup>

<sup>1</sup>Laboratory of Nanotechnology for Precision Medicine, Fondazione Istituto Italiano di Tecnologia, Via Morego 30, Genoa 16163, Italy

<sup>2</sup>Department of Informatics, Bioengineering, Robotics, and Systems Engineering (DIBRIS), University of Genoa, 16145 Genoa, Italy

<sup>3</sup>Department of Neuroscience and Brain Technologies, Fondazione Istituto Italiano di Tecnologia, Via Morego 30, Genoa 16163, Italy

<sup>4</sup>Laboratory of Regenerative Medicine, Center for Applied Medical Research - University of Navarra, Av. DaPio XII, 55, 31008, Pamplona, Spain

<sup>5</sup>Instituto de Investigación Sanitaria de Navarra (IdiSNA), 31008 Pamplona, Spain

<sup>6</sup>Department of Electrical and Information Engineering, Politecnico di Bari, 70126, Bari, Italy

†These authors share the senior authorship

\* Correspondence: Daniele Di Mascolo, PhD – daniele.dimascolo@iit.it

## SUPPORTING INFORMATION

|              | Tukey's multiple comparisons test | p-value        |           | Tukey's multiple comparisons test | p-value        |
|--------------|-----------------------------------|----------------|-----------|-----------------------------------|----------------|
| Numerosity   | 5x5 vs 10x10                      | 0.1331         | Perimeter | 5x5 vs 10x10                      | 0.0356 (*)     |
|              | 5x5 vs 20x20                      | 0.2040         |           | 5x5 vs 20x20                      | <0.0001 (****) |
|              | 10x10 vs 20x20                    | 0.8872         |           | 10x10 vs 20x20                    | <0.0001 (****) |
|              | 5x5 vs 10x10                      | 0.4994         |           | 5x5 vs 10x10                      | 0.9613         |
|              | 5x5 vs 20x20                      | 0.9452         |           | 5x5 vs 20x20                      | <0.0001 (****) |
|              | 10x10 vs 20x20                    | 0.6328         |           | 10x10 vs 20x20                    | <0.0001 (****) |
|              | 5x5 vs 10x10                      | 0.9454         |           | 5x5 vs 10x10                      | 0.0382 (*)     |
|              | 5x5 vs 20x20                      | 0.9076         |           | 5x5 vs 20x20                      | <0.0001 (****) |
|              | 10x10 vs 20x20                    | 0.7348         |           | 10x10 vs 20x20                    | <0.0001 (****) |
| Aspect Ratio | 5x5 vs 10x10                      | 0.0001 (**)    |           | 5x5 vs 10x10                      | 0.0001 (****)  |
|              | 5x5 vs 20x20                      | <0.0001 (****) |           | 5x5 vs 20x20                      | 0.0790         |
|              | 10x10 vs 20x20                    | 0.5820         |           | 10x10 vs 20x20                    | 0.0008 (**)    |
|              | 5x5 vs 10x10                      | <0.0001 (****) |           | 5x5 vs 10x10                      | 0.2256         |
|              | 5x5 vs 20x20                      | 0.0790         |           | 5x5 vs 20x20                      | 0.9919         |
|              | 10x10 vs 20x20                    | 0.0008 (**)    |           | 10x10 vs 20x20                    | 0.1310         |
|              | 5x5 vs 10x10                      | 0.2256         |           |                                   |                |
|              | 5x5 vs 20x20                      | 0.9919         |           |                                   |                |
|              | 10x10 vs 20x20                    | 0.1310         |           |                                   |                |

Comparison among the the three PLGA fabrics at 24h  
Comparison among the the three PLGA fabrics at 48h  
Comparison among the the three PLGA fabrics at 72h

**Supporting Figure S1. Statistical Analysis for the stem cell spheroid growth as a function of time and for three different PLGA fabrics.** Differences are considered statistically significant when  $p < 0.05$  (\*),  $p < 0.01$  (\*\*), and  $p < 0.0001$  (\*\*\*\*).

|    |           |                                   |         |             |           |                                   |             |
|----|-----------|-----------------------------------|---------|-------------|-----------|-----------------------------------|-------------|
| 2D | LIVE      | Tukey's multiple comparisons test | p-value | 2D collagen | LIVE      | Tukey's multiple comparisons test | p-value     |
|    |           | 24h vs 48h                        | 0.2742  |             |           | 24h vs 48h                        | 0.7550      |
|    |           | 24h vs 72h                        | 0.1675  |             |           | 24h vs 72h                        | 0.0322 (*)  |
|    | APOPTOTIC | 48h vs 72h                        | 0.9407  |             |           | 48h vs 72h                        | 0.1221      |
|    |           | 24h vs 48h                        | 0.2399  |             | APOPTOTIC | 24h vs 48h                        | 0.8354      |
|    |           | 24h vs 72h                        | 0.1432  |             |           | 24h vs 72h                        | 0.0895      |
|    |           | 48h vs 72h                        | 0.9387  |             |           | 48h vs 72h                        | 0.0304 (*)  |
|    | DEAD      | 24h vs 48h                        | 0.8383  |             | DEAD      | 24h vs 48h                        | 0.0011 (**) |
|    |           | 24h vs 72h                        | 0.1539  |             |           | 24h vs 72h                        | 0.1598      |
|    |           | 48h vs 72h                        | 0.3498  |             |           | 48h vs 72h                        | 0.0507      |

  

|                      |           |                                   |         |                        |           |                                   |         |
|----------------------|-----------|-----------------------------------|---------|------------------------|-----------|-----------------------------------|---------|
| 5x5µm<br>PLGA fabric | LIVE      | Tukey's multiple comparisons test | p-value | 10x10µm<br>PLGA fabric | LIVE      | Tukey's multiple comparisons test | p-value |
|                      |           | 24h vs 48h                        | 0.9433  |                        |           | 24h vs 48h                        | 0.8631  |
|                      |           | 24h vs 72h                        | 0.9859  |                        |           | 24h vs 72h                        | 0.7167  |
|                      | APOPTOTIC | 48h vs 72h                        | 0.8986  |                        |           | 48h vs 72h                        | 0.9611  |
|                      |           | 24h vs 48h                        | 0.9606  |                        | APOPTOTIC | 24h vs 48h                        | 0.9533  |
|                      |           | 24h vs 72h                        | 0.9951  |                        |           | 24h vs 72h                        | 0.6794  |
|                      |           | 48h vs 72h                        | 0.9427  |                        |           | 48h vs 72h                        | 0.8452  |
|                      | DEAD      | 24h vs 48h                        | 0.8178  |                        | DEAD      | 24h vs 48h                        | 0.6307  |
|                      |           | 24h vs 72h                        | 0.7942  |                        |           | 24h vs 72h                        | >0.9999 |
|                      |           | 48h vs 72h                        | 0.4889  |                        |           | 48h vs 72h                        | 0.6242  |

  

|                        |           |                                   |         |  |  |  |  |
|------------------------|-----------|-----------------------------------|---------|--|--|--|--|
| 20x20µm<br>PLGA fabric | LIVE      | Tukey's multiple comparisons test | p-value |  |  |  |  |
|                        |           | 24h vs 48h                        | 0.8309  |  |  |  |  |
|                        |           | 24h vs 72h                        | 0.7608  |  |  |  |  |
|                        | APOPTOTIC | 48h vs 72h                        | 0.9918  |  |  |  |  |
|                        |           | 24h vs 48h                        | 0.7737  |  |  |  |  |
|                        |           | 24h vs 72h                        | 0.8457  |  |  |  |  |
|                        |           | 48h vs 72h                        | 0.9910  |  |  |  |  |
|                        | DEAD      | 24h vs 48h                        | 0.5590  |  |  |  |  |
|                        |           | 24h vs 72h                        | 0.7943  |  |  |  |  |
|                        |           | 48h vs 72h                        | 0.2802  |  |  |  |  |

  

% of live cells over time on different substrates
 % of apoptotic cells over time on different substrates
 % of dead cells over time on different substrates

**Supporting Figure S2. Statistical Analysis for the stem cell spheroid viability as a function of time and for three different PLGA fabrics.** Differences were considered statistically significant for  $p < 0.05$  (\*) and  $p < 0.01$  (\*\*).
